# Supplementary material for: Contribution of NIH funding to new drug approvals 2010–2016
Source: PubMed Central journal article supplement — Proc Natl Acad Sci U S A. 2018 Feb 12;115(10):2329–34. doi: 10.1073/pnas.1715368115 (PMC5878010; doi:10.1073/pnas.1715368115), 2018-02-12
Supplement: pnas.201715368SI.pdf [file pnas.201715368SI.pdf]

# Supporting Information

Galkina Cleary et al. 10.1073/pnas.1715368115

## SI Methods

**Data Collection.** NMEs approved by the Center for Drug Evaluation and Research (CDER) at the FDA from 2010–2016 were identified from FDA reports (1). Biosimilars, vaccines, diagnostic, and imaging agents were excluded from this analysis. For combination therapies, we considered only molecular entities that were not previously approved either as a stand-alone therapeutic or in other combinations. NMEs were characterized as “biologic” or “small molecule,” as well as “first in class” or “follow-on” based on assignments by the FDA (2).

The method of drug discovery was classified as “phenotypic” or “targeted” using the criteria described by Swinney et al. (3, 4). Briefly, NMEs were classified as phenotypic if discovery occurred independent of knowledge of the target, involved screens based on biological activities rather than on targets, or involved modification of pharmacophores based on biological activity. NMEs were classified as targeted when discovery involved screens against specific targets, assays of target activity, or modification of a natural substrate based on target affinity or activity. All biologics were classified as targeted as in Swinney et al. (3, 4).

Known molecular targets for each NME were determined from FDA labels (5), DrugBank (6), Therapeutic Target Database (7), or Pharmaprojects (8). For NMEs discovered using targeted methods, the molecular target is considered the target used in drug screening. For biological products comprising a naturally occurring protein, the target is considered the normal counterpart of the biological product.

Approved clinical indications were determined from FDA labels, and therapeutic areas were assigned according to a modification of DiMasi et al. (9).

PubMed searches were performed for each of the 210 drugs (drug search) using an ontology of drug name synonyms provided in ChEMBL (10), which includes brand names, generic names, and precommercial corporate designations, as well as the NCBI Query Translation, which incorporates related MeSH Terms. PubMed searches were performed for each of the 151 molecular targets using Boolean search terms and NCBI Query Translation (target search). The results were screened to confirm the relevance of the publications identified from searches, and search terms were optimized as necessary. Search terms for both drug and target searches are given in Table S1. The PMID was recorded for publications appearing in the search results. At the time of this analysis, PubMed entries for 2016 were not yet complete, so trends were examined only through 2015.

**Data Analysis.** Information on projects funded by the NIH and other agencies within the US Department of Health and Human Services was obtained from the RePORTER/ExPORTER format files catalog (11). The Project and Link Tables were imported to a PostgreSQL database after standardizing for inconsistent formats. The RePORTER database includes data on publications that acknowledge federal support from 1980–present, information on projects funded from 1985–present, and fiscal year costs for projects funded by NIH, Centers for Disease Control and Prevention, Administration for Children and Families, or FDA from 2000–present. As of April 2017, the RePORTER database lists

1,380,121 research publications in PubMed that cite federal research support and 129,728 projects.

The Link Table in RePORTER associates the PMID for each publication with one or more projects that provided funding for the work and the year of publication. The Project Data Table provides data on the fiscal year cost for each project (2000–present only). The activity code associated with each core project number indicates the grant type.

PMIDs identified in drug or target searches were associated with specific projects via the Link Table. Each PMID was associated with a funding year corresponding to the project number and year given in the Link Table. Costs were assigned for funding year corresponding to the program cost for that year given in the Project Data Table.

Limitations in the scope and control of the RePORTER database have been addressed by previous authors (12). These include inconsistent formatting and data nomenclature, incomplete reporting of projects and costs by different agencies, and limited data curation. These limitations were evident in PMIDs that sometimes preceded the first year of the associated project as well as by PMIDs published long after the last year of the project (12). For this analysis, no costs were associated with funding years preceding the fiscal year of the project or following more than 4 y after the end of the project. Recognizing that research performed in the final years of a project could continue to produce publications for several years, we included the cost associated with the final year of the project for PMIDs published within the following 4 y. This is consistent with the observation of Boyack and Jordan (12), who identified a 3-y lag between funding and publication.

There was considerable redundancy in the initial data associations. PMIDs could be identified more than once in different drug or target searches, and each PMID could be associated with multiple projects in the Link Table. Funding years could be identified more than once if the project was associated with more than one PMID. Consequently, each analysis required two steps, first identifying all PMIDs or project years with the characteristic being ascertained and then eliminating duplicates resulting from redundant ascertainment.

Funding years were categorized as “drug” if one or more of the PMIDs associated with that project were identified in a drug search. Funding years were categorized as “target only” if each PMID associated with that project was identified through target searches. Funding years associated with PMIDs identified through both drug searches and target searches are designated as “drug.” For each analysis, unique funding years were identified by eliminating duplicate funding years resulting from projects associated with more than one PMID. The process is illustrated in a schematic (Fig. S1), and an illustrative example (venetoclax) is shown in Fig. S2.

Data analysis and visualization were performed in PostgreSQL, Excel, and Tableau. All costs are given in constant dollars inflation-adjusted to 2016 using the US Bureau of Labor Statistics’ CPI (13). All analysis is based on PubMed and RePORTER data accessed in April 2017. The data used for this analysis, including the 610,702 PMIDs identified in a drug or target search as well as RePORTER, project numbers, and year, are provided in Dataset S1.

1. US Food & Drug Administration (2017) New molecular entity (NME) drug and new biologic approvals. Available at <https://www.fda.gov/Drugs/DevelopmentApprovalProcess/HowDrugsareDevelopedandApproved/DrugandBiologicApprovalReports/NDAAand-BLAAApprovalReports/ucm373420.htm>. Accessed April 12, 2017.

2. U.S. Food & Drug Administration (2017) New drugs at FDA: CDER's new molecular entities and new therapeutic biological products. Available at <https://www.fda.gov/Drugs/DevelopmentApprovalProcess/DrugInnovation/default.htm>. Accessed April 12, 2017.

3. Swinney DC (2013) Phenotypic vs. target-based drug discovery for first-in-class medicines. *Clin Pharmacol Ther* 93:299–301.
4. Swinney DC, Anthony J (2011) How were new medicines discovered? *Nat Rev Drug Discov* 10:507–519.
5. US Food & Drug Administration (2017) FDA online label repository. Available at <https://labels.fda.gov/>. Accessed April 12, 2017.
6. Law V, et al. (2014) DrugBank 4.0: Shedding new light on drug metabolism. *Nucleic Acids Res* 42:D1091–D1097.
7. Yang H, et al. (2016) Therapeutic target database update 2016: Enriched resource for bench to clinical drug target and targeted pathway information. *Nucleic Acids Res* 44:D1069–D1074.
8. Informa (2017) Pharmaprojects: Track pharma R&D. Available at <https://pharmaintelligence.informa.com/products-and-services/data-and-analysis/pharmaprojects>. Accessed April 12, 2017.
9. DiMasi JA, Grabowski HG, Vernon J (2004) R&D costs and returns by therapeutic category. *Drug Inf J* 38:211–223.
10. EMBL-EBI (2017) ChEMBL. Available at <https://www.ebi.ac.uk/chembl/>. Accessed April 12, 2017.
11. National Institutes of Health (2017) Research portfolio online reporting tools (RePORTER), ExPORTER data catalog. Available at [https://exporter.nih.gov/ExPORTER\\_Catalog.aspx](https://exporter.nih.gov/ExPORTER_Catalog.aspx). Accessed April 12, 2017.
12. Boyack KW, Jordan P (2011) Metrics associated with NIH funding: A high-level view. *J Am Med Inform Assoc* 18:423–431.
13. United States Department of Labor (2017) Bureau of labor statistics: CPI-All urban consumers (current series). Available at <https://data.bls.gov/timeseries/CUUR0000SA0>. Accessed April 12, 2017.

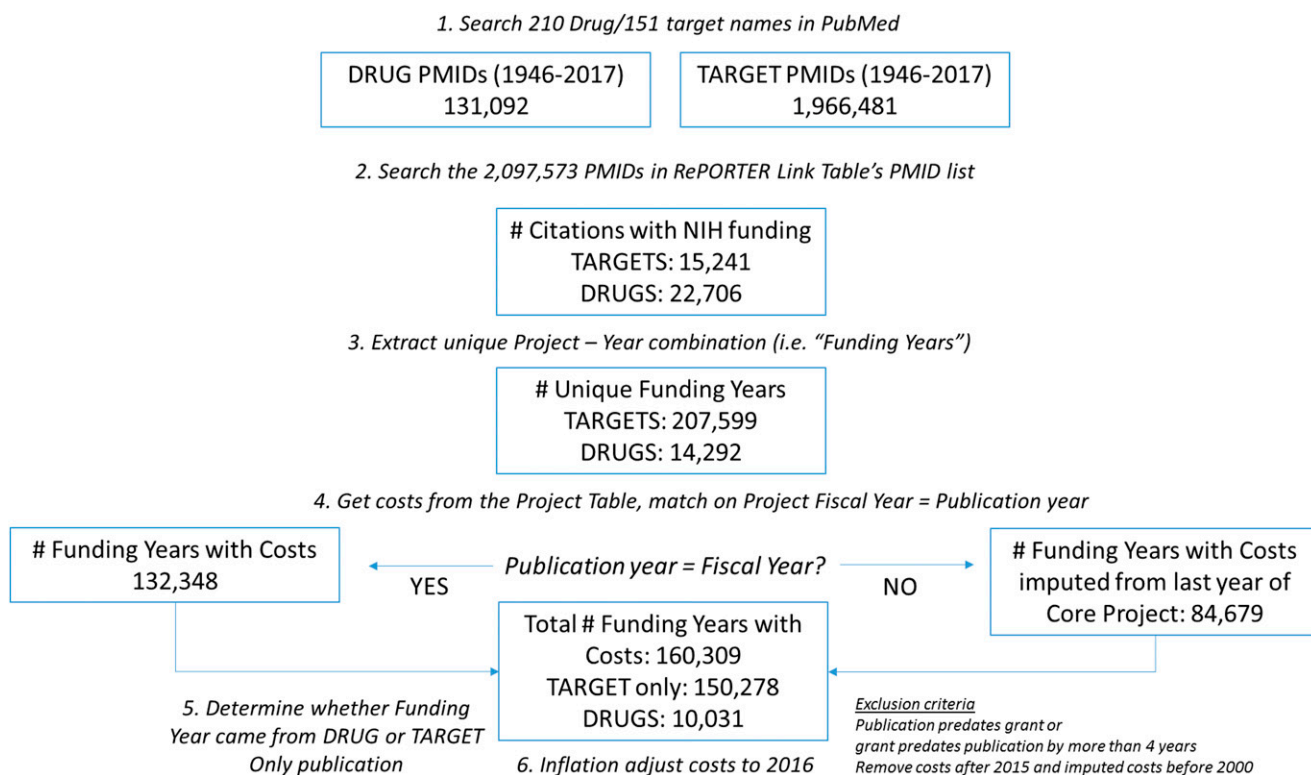

Fig. S1. Step-by-step procedure for linking PMIDs associated with drug and target searches to NIH-funded projects and costs in RePORTER.

1. Venetoclax and its target, Bcl-2, in PubMed

|                               |                                    |
|-------------------------------|------------------------------------|
| DRUG PMIDs (1946-2017)<br>286 | TARGET PMIDs (1946-2017)<br>57,362 |
|-------------------------------|------------------------------------|

2. Search the 57,648 PMIDs in RePORTER Link Table's PMID list

|                                                                  |
|------------------------------------------------------------------|
| # Citations with NIH funding<br>Bcl-2: 15,241<br>Venetoclax: 164 |
|------------------------------------------------------------------|

3. Extract unique Project – Year combination (i.e. "Funding Years")

|                                                            |
|------------------------------------------------------------|
| # Unique Funding Years<br>Bcl-2: 11,664<br>Venetoclax: 130 |
|------------------------------------------------------------|

4. Get costs from the Project Table, match on Project Fiscal Year = Publication year

|                                                                             |
|-----------------------------------------------------------------------------|
| Total # Funding Years with<br>Costs: 9574<br>Bcl-2: 9452<br>Venetoclax: 122 |
|-----------------------------------------------------------------------------|

Exclusion criteria  
 Publication predates grant or grant predates  
 publication by more than 4 years  
 Remove costs after 2015, imputed costs before 2000

Fig. S2. An illustrative example of how NIH funding was assigned to the research associated with the drug venetoclax and its molecular target, Bcl-2.

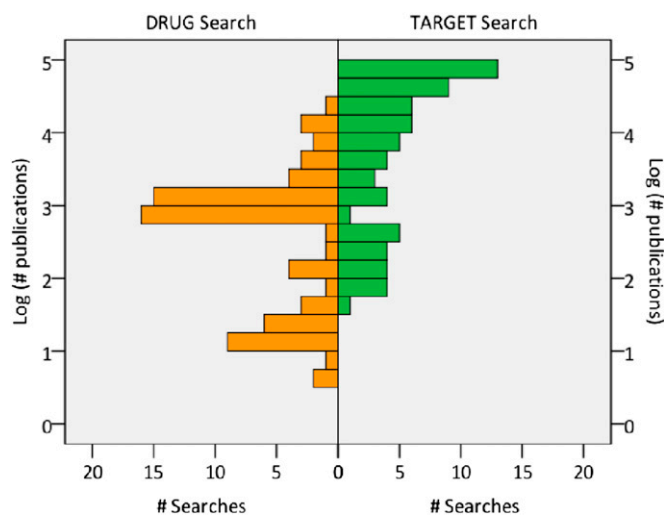

Fig. S3. Publications in PubMed identified through searches for 210 NMEs approved by the FDA between 2010–2016 (drug search, Left) or the 151 known molecular targets for these NMEs (target search, Right). The number of publications retrieved from each search is shown on a log scale.

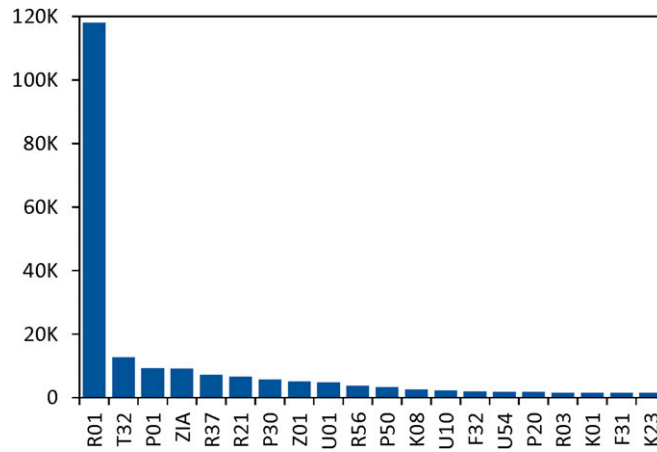

Fig. 54. Leading grant activity codes for projects associated with 210 NMEs approved 2010–2016 or their molecular targets. Activity codes are defined in Table S3.

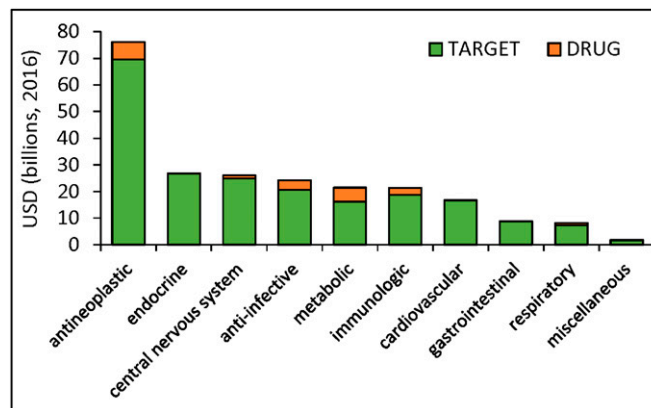

Fig. 55. Distribution of costs associated with published research for NMEs approved 2010–2016 by therapeutic area.

Table S1. Drug search statistics

| Drug                                     | Publications in PubMed | Publications in RePORTER | No. funding years |
|------------------------------------------|------------------------|--------------------------|-------------------|
| Abiraterone                              | 601                    | 159                      | 129               |
| Acidinium bromide                        | 138                    |                          |                   |
| Ado-trastuzumab emtansine                | 344                    | 52                       | 49                |
| Afatinib                                 | 709                    | 223                      | 182               |
| Aflibercept                              | 1,262                  | 261                      | 245               |
| Albiglutide                              | 127                    | 4                        | 4                 |
| Alcaftadine                              | 18                     |                          |                   |
| Alectinib                                | 195                    | 28                       | 20                |
| Alglucosidase alfa                       | 315                    | 101                      | 86                |
| Alirocumab                               | 252                    | 4                        | 4                 |
| Alogliptin                               | 383                    | 35                       | 33                |
| Apixaban                                 | 2,009                  | 44                       | 40                |
| Apremilast                               | 242                    | 13                       | 13                |
| Aripiprazole lauroxil                    | 15                     |                          |                   |
| Asfotase alfa                            | 66                     | 19                       | 17                |
| Asparaginase <i>Erwinia chrysanthemi</i> | 89                     | 20                       | 19                |
| Atezolizumab                             | 546                    | 279                      | 253               |
| Avanafil                                 | 80                     | 3                        | 3                 |
| Avibactam*                               | 274                    | 72                       | 42                |
| Axitinib                                 | 642                    | 102                      | 85                |
| Azilsartan                               | 72                     | 5                        | 5                 |
| Bazedoxifene acetate*                    | 312                    | 60                       | 58                |
| Bedaquiline                              | 376                    | 87                       | 85                |
| Belatacept                               | 3,178                  | 858                      | 699               |
| Belimumab                                | 422                    | 70                       | 55                |
| Belinostat                               | 190                    | 101                      | 95                |
| Bezlotoxumab                             | 27                     | 6                        | 6                 |
| Blinatumomab                             | 189                    | 39                       | 28                |
| Boceprevir                               | 1,020                  | 152                      | 132               |
| Bosutinib                                | 349                    | 158                      | 122               |
| Brentuximab vedotin                      | 508                    | 135                      | 105               |
| Brexpiprazole                            | 78                     |                          |                   |
| Brivaracetam                             | 145                    | 5                        | 5                 |
| Cabazitaxel                              | 576                    | 83                       | 70                |
| Cabozantinib                             | 394                    | 187                      | 154               |
| Canagliflozin                            | 462                    | 16                       | 16                |
| Cangrelor                                | 453                    | 68                       | 61                |
| Carfilzomib                              | 547                    | 269                      | 223               |
| Carglumic acid                           | 28                     | 14                       | 14                |
| Cariprazine                              | 87                     | 3                        | 3                 |
| Ceftaroline fosamil                      | 187                    | 10                       | 10                |
| Ceftolozane*                             | 164                    | 14                       | 12                |
| Ceritinib                                | 225                    | 40                       | 26                |
| Cholic acid                              | 5,834                  | 713                      | 640               |
| Cobimetinib                              | 98                     | 21                       | 21                |
| Collagenase clostridium histolyticum     | 5,720                  | 199                      | 175               |
| Crisaborole                              | 20                     |                          |                   |
| Crizotinib                               | 1,389                  | 504                      | 373               |
| Crofelemer                               | 68                     | 24                       | 19                |
| Dabigatran                               | 3,620                  | 169                      | 144               |
| Dabrafenib                               | 578                    | 216                      | 172               |
| Daclatasvir                              | 618                    | 95                       | 75                |
| Dalbavancin                              | 414                    | 19                       | 18                |
| Dalfampridine                            | 6,440                  | 933                      | 868               |
| Dapagliflozin                            | 514                    | 28                       | 27                |
| Daratumumab                              | 150                    | 18                       | 9                 |
| Defibrotide sodium                       | 432                    | 25                       | 25                |
| Denosumab                                | 1,853                  | 144                      | 124               |
| Deoxycholic acid                         | 14,747                 | 1,477                    | 1,295             |
| Dienogest                                | 429                    | 1                        | 1                 |
| Dimethyl fumarate                        | 816                    | 132                      | 127               |
| Dinutuximab                              | 128                    | 46                       | 44                |

Table S1. Cont.

| Drug                        | Publications in PubMed | Publications in RePORTER | No. funding years |
|-----------------------------|------------------------|--------------------------|-------------------|
| Dolutegravir                | 428                    | 85                       | 73                |
| Droxidopa                   | 667                    | 116                      | 103               |
| Dulaglutide                 | 147                    | 8                        | 7                 |
| Edoxaban                    | 791                    | 21                       | 20                |
| Efinaconazole               | 109                    | 1                        | 1                 |
| Elbasvir grazoprevir*       | 134                    | 9                        | 9                 |
| Eliglustat                  | 54                     | 26                       | 22                |
| Elosulfase alfa             | 112                    | 21                       | 18                |
| Elotuzumab                  | 134                    | 60                       | 48                |
| Eluxadoline                 | 44                     | 1                        | 1                 |
| Elvitegravir cobicistat*    | 543                    | 193                      | 177               |
| Empagliflozin               | 462                    | 35                       | 25                |
| Enzalutamide                | 987                    | 438                      | 330               |
| Eribulin                    | 377                    | 100                      | 94                |
| Eslicarbazepine acetate     | 172                    | 2                        | 2                 |
| Eteplirsen                  | 40                     | 3                        | 3                 |
| Ethyl eicosapentaenoic acid | 252                    | 27                       | 27                |
| Evolocumab                  | 251                    | 5                        | 4                 |
| Ezogabine                   | 458                    | 121                      | 115               |
| Fidaxomicin                 | 364                    | 40                       | 38                |
| Finaxofloxacin              | 19                     |                          |                   |
| Fingolimod                  | 2,394                  | 859                      | 727               |
| Flibanserin                 | 139                    | 8                        | 8                 |
| Gabapentin enacarbil        | 90                     | 2                        | 2                 |
| Glucarpidase                | 618                    | 135                      | 127               |
| Ibrutinib                   | 850                    | 492                      | 281               |
| Icatibant                   | 1,716                  | 214                      | 182               |
| Idarucizumab                | 199                    | 3                        | 3                 |
| Idelalisib                  | 365                    | 157                      | 105               |
| IncobotulinumtoxinA         | 255                    | 13                       | 12                |
| Indacaterol                 | 356                    | 8                        | 8                 |
| Ingenol mebutate            | 218                    | 13                       | 13                |
| Insulin degludec            | 291                    | 5                        | 5                 |
| Ipilimumab                  | 6,539                  | 2,396                    | 1,940             |
| Isavuconazonium             | 200                    | 9                        | 8                 |
| Ivabradine                  | 1,017                  | 49                       | 47                |
| Ivacaftor*                  | 345                    | 219                      | 179               |
| Ixazomib citrate            | 146                    | 57                       | 46                |
| Ixekizumab                  | 147                    | 6                        | 6                 |
| Ledipasvir*                 | 498                    | 48                       | 36                |
| Lenvatinib                  | 178                    | 22                       | 14                |
| Lesinurad                   | 47                     | 5                        | 5                 |
| Levomilnacipran             | 673                    | 17                       | 16                |
| Lifitegrast                 | 22                     | 4                        | 4                 |
| Linacotide                  | 199                    | 38                       | 32                |
| Linagliptin                 | 474                    | 26                       | 21                |
| Liraglutide                 | 1,668                  | 181                      | 162               |
| Lixisenatide                | 229                    | 6                        | 6                 |
| Lomitapide                  | 145                    | 14                       | 13                |
| Lorcaserin                  | 259                    | 64                       | 60                |
| Lucinactant                 | 116                    | 20                       | 18                |
| Luliconazole                | 61                     |                          |                   |
| Lumacaftor                  | 154                    | 121                      | 100               |
| Lurasidone                  | 281                    | 4                        | 4                 |
| Macitentan                  | 167                    | 15                       | 15                |
| Mepolizumab                 | 282                    | 57                       | 55                |
| Metreleptin                 | 150                    | 187                      | 113               |
| Miltefosine                 | 1,157                  | 63                       | 58                |
| Mipomersen                  | 193                    | 17                       | 17                |
| Mirabegron                  | 309                    | 16                       | 13                |
| Naloxegol                   | 65                     | 1                        | 1                 |

Table S1. Cont.

| Drug                               | Publications in PubMed | Publications in RePORTER | No. funding years |
|------------------------------------|------------------------|--------------------------|-------------------|
| Necitumumab                        | 75                     | 4                        | 4                 |
| Netupitant*                        | 75                     | 6                        | 6                 |
| Nintedanib                         | 370                    | 52                       | 48                |
| Nivolumab                          | 1,081                  | 227                      | 187               |
| Nusinersen                         | 13                     | 1                        | 1                 |
| Obeticholic acid                   | 184                    | 64                       | 58                |
| Obiltoximab                        | 11                     | 5                        | 5                 |
| Obinutuzumab                       | 351                    | 62                       | 48                |
| Ocriplasmin                        | 268                    | 11                       | 10                |
| Olaparib                           | 573                    | 343                      | 303               |
| Olaratumab                         | 24                     | 13                       | 13                |
| Olodaterol                         | 111                    |                          |                   |
| Omacetaxine mepesuccinate          | 459                    | 83                       | 72                |
| Ombitasvir paritaprevir dasabuvir* | 309                    | 15                       | 15                |
| Oritavancin                        | 320                    | 17                       | 16                |
| Osimertinib                        | 178                    | 68                       | 53                |
| Ospemifene                         | 135                    | 19                       | 18                |
| Palbociclib                        | 300                    | 193                      | 184               |
| Panobinostat                       | 593                    | 352                      | 299               |
| Parathyroid hormone                | 35                     | 4                        | 3                 |
| Pasireotide                        | 418                    | 49                       | 43                |
| Patiromer                          | 58                     | 3                        | 3                 |
| Peginesatide                       | 58                     | 9                        | 9                 |
| Peginterferon beta-1A              | 48                     | 1                        | 1                 |
| Pegloticase                        | 111                    | 6                        | 6                 |
| Pembrolizumab                      | 735                    | 175                      | 140               |
| Peramivir                          | 331                    | 38                       | 34                |
| Perampanel                         | 235                    | 12                       | 9                 |
| Pertuzumab                         | 632                    | 114                      | 100               |
| Picosulfate                        | 886                    | 142                      | 142               |
| Pimavanserin                       | 85                     | 9                        | 9                 |
| Pirfenidone                        | 703                    | 88                       | 86                |
| Polidocanol                        | 1,167                  | 46                       | 44                |
| Pomalidomide                       | 730                    | 154                      | 125               |
| Ponatinib                          | 363                    | 177                      | 127               |
| Ramucirumab                        | 331                    | 33                       | 28                |
| Raxibacumab                        | 23                     | 3                        | 3                 |
| Reslizumab                         | 445                    | 75                       | 60                |
| Reslizumab                         | 85                     | 27                       | 27                |
| Rilpivirine                        | 455                    | 169                      | 139               |
| Riociguat                          | 202                    | 10                       | 10                |
| Rivaroxaban                        | 3,218                  | 101                      | 85                |
| Roflumilast                        | 468                    | 55                       | 54                |
| Rolapitant                         | 44                     |                          |                   |
| Rucaparib                          | 113                    | 71                       | 70                |
| Ruxolitinib                        | 671                    | 333                      | 236               |
| Sacubitril*                        | 247                    | 14                       | 14                |
| Sebelipase alfa                    | 21                     | 5                        | 5                 |
| Secukinumab                        | 293                    | 12                       | 12                |
| Selexipag                          | 56                     | 11                       | 11                |
| Siltuximab                         | 105                    | 59                       | 56                |
| Simeprevir                         | 630                    | 72                       | 63                |
| Sofosbuvir*                        | 1,358                  | 159                      | 113               |
| Sonidegib                          | 88                     | 52                       | 52                |
| Spinosad                           | 667                    | 10                       | 9                 |
| Sugammadex                         | 764                    | 4                        | 4                 |
| Suvorexant                         | 116                    | 10                       | 10                |
| Tafluprost                         | 164                    | 7                        | 7                 |
| Taliglucerase alfa                 | 36                     | 2                        | 2                 |
| Tasimelteon                        | 57                     | 3                        | 3                 |
| Tavorole                           | 76                     | 3                        | 3                 |

**Table S1. Cont.**

| Drug               | Publications in PubMed | Publications in RePORTER | No. funding years |
|--------------------|------------------------|--------------------------|-------------------|
| Tedizolid          | 100                    | 2                        | 2                 |
| Teduglutide        | 109                    | 7                        | 7                 |
| Telaprevir         | 1,450                  | 221                      | 188               |
| Teriflunomide      | 301                    | 21                       | 18                |
| Tesamorelin        | 66                     | 53                       | 39                |
| Ticagrelor         | 1,550                  | 58                       | 57                |
| Tipiracil*         | 485                    | 38                       | 37                |
| Tocilizumab        | 1,843                  | 219                      | 200               |
| Tofacitinib        | 598                    | 117                      | 111               |
| Trabectedin        | 694                    | 95                       | 85                |
| Trametinib         | 519                    | 299                      | 254               |
| Ulipristal         | 1,145                  | 117                      | 111               |
| Umeclidinium*      | 134                    |                          |                   |
| Uridine triacetate | 13                     |                          |                   |
| Vandetanib         | 748                    | 235                      | 202               |
| Vedolizumab        | 329                    | 33                       | 30                |
| Velaglucerase alfa | 2,048                  | 533                      | 383               |
| Velpatasvir        | 66                     | 1                        | 1                 |
| Vemurafenib        | 1,529                  | 735                      | 555               |
| Venetoclax         | 286                    | 164                      | 130               |
| Vilanterol*        | 227                    |                          |                   |
| Vilazodone         | 138                    | 1                        | 1                 |
| Vismodegib         | 442                    | 214                      | 198               |
| Vorapaxar          | 253                    | 28                       | 28                |
| Vortioxetine       | 213                    | 2                        | 2                 |
| Ziv-aflibercept    | 1,127                  | 205                      | 193               |

Drug search terms were generated from drug names using ChEMBL synonyms as described in Methods.

\*Approved in combination.



**Table S2. Target search statistics**

| Target                                                    | Publications in PubMed | Publications in RePORTER | No. of funding years |
|-----------------------------------------------------------|------------------------|--------------------------|----------------------|
| 5-Ht1a receptors or serotonin reuptake                    | 21,717                 | 4,093                    | 3,521                |
| 5-HT2C receptor                                           | 2,129                  | 682                      | 585                  |
| Adrenergic receptor                                       | 73,220                 | 12,916                   | 10,059               |
| Adrenoreceptor beta 2, surface                            | 988                    | 412                      | 384                  |
| Alpha glucosidase                                         | 9,880                  | 624                      | 508                  |
| Alpha4beta7 integrin                                      | 724                    | 487                      | 442                  |
| AMPA 1                                                    | 8,732                  | 3,801                    | 3,327                |
| Anaplastic lymphoma kinase                                | 3,216                  | 843                      | 609                  |
| Androgen receptor                                         | 24,601                 | 8,133                    | 6,001                |
| Angiotensin ii type 1 receptor                            | 14,165                 | 3,634                    | 2,794                |
| Anthrax toxin receptor                                    | 181                    | 192                      | 173                  |
| APOB or apolipoprotein B                                  | 16,865                 | 3,677                    | 2,800                |
| Asparaginase                                              | 4,046                  | 391                      | 286                  |
| Bacterial RNA polymerase                                  | 22,559                 | 4,432                    | 3,784                |
| Bcl-2                                                     | 57,362                 | 15,241                   | 11,781               |
| Bcr-abl                                                   | 20,458                 | 3,550                    | 2,348                |
| Beta 3 and adrenergic receptor                            | 2,189                  | 436                      | 413                  |
| Beta glucocerebrosidase                                   | 2,240                  | 590                      | 423                  |
| Beta lactamases                                           | 21,668                 | 1,597                    | 961                  |
| Beta-2-adrenergic receptor                                | 8,415                  | 2,641                    | 2,147                |
| Beta-glucosidase or beta-glucosidase                      | 7,051                  | 290                      | 238                  |
| Botulinum toxin A                                         | 8,177                  | 637                      | 520                  |
| Bradykinin receptor B2                                    | 3,064                  | 584                      | 495                  |
| Braf                                                      | 9,744                  | 5,080                    | 3,093                |
| Bruton's tyrosine kinase                                  | 1,528                  | 838                      | 666                  |
| c-Met or hepatocyte growth factor                         | 16,054                 | 5,968                    | 5,077                |
| Carbamoyl-phosphate synthase                              | 1,528                  | 259                      | 224                  |
| Carboxypeptidase g                                        | 619                    | 139                      | 131                  |
| CD3                                                       | 39,975                 | 8,427                    | 7,166                |
| CD20                                                      | 12,202                 | 2,188                    | 1,830                |
| CD30                                                      | 4,411                  | 493                      | 423                  |
| CD38                                                      | 6,262                  | 2,586                    | 2,092                |
| Cdk4 or cdk6                                              | 6,495                  | 2,328                    | 2,079                |
| Cell wall synthesis                                       | 45,739                 | 10,540                   | 9,120                |
| Ceramide glucosyltransferase or glucosylceramide synthase | 691                    | 291                      | 255                  |
| CFTR                                                      | 9,268                  | 4,357                    | 2,890                |
| Chloride channels                                         | 33,895                 | 11,477                   | 8,146                |
| Cholic acid                                               | 1,829                  | 285                      | 272                  |
| Clostridium difficile toxin b                             | 1,178                  | 312                      | 246                  |
| Coagulation factor X                                      | 9,535                  | 2,296                    | 1,940                |
| CYP17A1                                                   | 3,089                  | 1,007                    | 844                  |
| Cytotoxic T lymphocyte-associated protein 4 or CTLA-4     | 6,679                  | 2,662                    | 2,217                |
| Dabigatran                                                | 3,615                  | 169                      | 144                  |
| Dihydroorotate dehydrogenase                              | 564                    | 188                      | 152                  |
| Dipeptidyl-peptidase 4                                    | 5,272                  | 815                      | 695                  |
| DNA gyrase                                                | 4,337                  | 500                      | 432                  |
| Dopamine receptor                                         | 58,112                 | 17,116                   | 12,361               |
| Dopamine receptor or serotonin receptor                   | 97,784                 | 24,694                   | 17,685               |
| Dystrophin                                                | 7,426                  | 2,127                    | 1,633                |
| EGFR                                                      | 42,721                 | 17,682                   | 12,278               |
| Endothelin receptor                                       | 14,195                 | 3,017                    | 2,548                |
| ErbB1 or erbB2                                            | 25,069                 | 8,429                    | 6,155                |
| Erythropoietin                                            | 29,377                 | 3,339                    | 2,751                |
| <i>Escherichia coli</i> ATP synthase                      | 1,253                  | 336                      | 258                  |
| Estrogen receptor                                         | 73,892                 | 22,871                   | 14,987               |
| Factor Xa                                                 | 9,544                  | 1,276                    | 979                  |
| Farnesoid x receptor                                      | 1,764                  | 1,186                    | 909                  |
| Fluorouracil or capecitabine                              | 41,809                 | 4,107                    | 2,807                |
| Gag pol HIV                                               | 2,062                  | 1,469                    | 1,229                |
| Gag pol HIV or cytochrome p450 3a                         | 11,296                 | 3,947                    | 3,099                |
| Glucagon-like peptide 1                                   | 10,095                 | 2,783                    | 2,222                |
| Glucagon-like peptide 2 or glp2 or glp-2                  | 900                    | 199                      | 176                  |

Table S2. Cont.

| Target                                                       | Publications in PubMed | Publications in RePORTER | No. of funding years |
|--------------------------------------------------------------|------------------------|--------------------------|----------------------|
| Glycolipid gd2 or disialoganglioside gd2                     | 730                    | 287                      | 231                  |
| Growth hormone-releasing hormone                             | 4,901                  | 488                      | 362                  |
| Guanylyl cyclase c                                           | 492                    | 223                      | 128                  |
| H1 histamine receptor                                        | 2,124                  | 197                      | 172                  |
| HCV NS3                                                      | 2,696                  | 589                      | 493                  |
| HCV ns3 or hcv ns4a                                          | 2,722                  | 608                      | 506                  |
| HCV ns5a                                                     | 1,691                  | 504                      | 426                  |
| HCV ns5a or hcv NS3 or HCV NS5B                              | 4,880                  | 1,099                    | 870                  |
| HCV NS5B                                                     | 1,761                  | 326                      | 278                  |
| Hedgehog signaling or hedgehog AND <i>Drosophila</i>         | 8,633                  | 5,714                    | 4,655                |
| HER2 or eErb2 or p185                                        | 18,605                 | 6,315                    | 4,496                |
| Histone deacetylases                                         | 14,199                 | 10,255                   | 8,290                |
| Hyperpolarization-activated cyclic nucleotide-gated channels | 1,294                  | 814                      | 686                  |
| Insulin receptor                                             | 56,159                 | 22,054                   | 16,250               |
| IFN beta 1                                                   | 10,668                 | 2,967                    | 2,589                |
| Interleukin 5                                                | 6,444                  | 1,365                    | 1,178                |
| Interleukin 6 receptor                                       | 12,779                 | 4,606                    | 4,317                |
| Interleukin 17                                               | 9,015                  | 5,802                    | 4,754                |
| Janus kinases                                                | 8,912                  | 3,954                    | 3,258                |
| Leptin                                                       | 31,553                 | 12,164                   | 8,690                |
| Leucyl-tRNA synthetase                                       | 503                    | 77                       | 61                   |
| Lfa-1                                                        | 6,179                  | 1,556                    | 1,270                |
| Lysosomal acid lipase                                        | 2,498                  | 462                      | 417                  |
| M3 muscarinic receptor                                       | 3,275                  | 811                      | 719                  |
| Melatonin receptor                                           | 4,538                  | 702                      | 605                  |
| Microbial collagenase                                        | 5,441                  | 166                      | 149                  |
| Microsomal triglyceride transfer protein                     | 1,030                  | 520                      | 390                  |
| Microtubule assembly                                         | 31,444                 | 10,392                   | 8,129                |
| Mitogen-activated protein kinase kinases                     | 11,326                 | 5,583                    | 5,014                |
| N-acetylgalactosamine 6 sulfatase                            | 429                    | 83                       | 73                   |
| Neutral endopeptidase                                        | 6,180                  | 1,141                    | 929                  |
| NF- $\kappa$ b                                               | 55,920                 | 23,669                   | 18,791               |
| Nrf2 or NFE2I2                                               | 8,719                  | 4,753                    | 3,505                |
| Orexin receptors 1 and 2                                     | 788                    | 326                      | 293                  |
| Oxazolidinones                                               | 7,943                  | 510                      | 474                  |
| p2y receptor                                                 | 4,190                  | 1,210                    | 965                  |
| Parathyroid hormone receptor                                 | 5,126                  | 1,786                    | 1,426                |
| PARP                                                         | 13,372                 | 4,595                    | 3,838                |
| Penicillin-binding proteins                                  | 4,200                  | 553                      | 443                  |
| Phosphodiesterase 4                                          | 2,577                  | 816                      | 761                  |
| Phosphodiesterase 5                                          | 4,343                  | 1,131                    | 964                  |
| Phosphoinositide 3-kinase                                    | 9,056                  | 5,014                    | 4,399                |
| Plasmin                                                      | 14,591                 | 1,700                    | 1,487                |
| Poly ADP ribose polymerase                                   | 15,605                 | 5,198                    | 4,283                |
| Potassium channel                                            | 65,278                 | 19,950                   | 14,853               |
| Potassium voltage-gated channel                              | 8,613                  | 3,428                    | 2,856                |
| Progesterone receptor                                        | 17,100                 | 4,019                    | 3,114                |
| Programmed cell death 1                                      | 2,941                  | 2,378                    | 1,950                |
| Programmed cell death-ligand 1                               | 1,228                  | 805                      | 705                  |
| Proprotein convertase subtilisin kexin type 9                | 958                    | 222                      | 198                  |
| Prostaglandin F receptor                                     | 2,251                  | 351                      | 333                  |
| Protease activated receptor                                  | 2,677                  | 1,585                    | 1,253                |
| Proteasome endopeptidase complex                             | 16,300                 | 8,313                    | 7,033                |
| Protective antigen anthrax                                   | 1,265                  | 800                      | 570                  |
| Protein kinase c-delta                                       | 2,229                  | 1,329                    | 1,185                |
| Receptor tyrosine kinase                                     | 146,941                | 56,895                   | 39,494               |
| Receptors, cholinergic                                       | 38,692                 | 10,452                   | 7,066                |
| Receptors, epoprostenol                                      | 394                    | 109                      | 92                   |
| Receptors, lysosphingolipid                                  | 1,453                  | 1,337                    | 1,028                |
| Receptors, opioid                                            | 23,751                 | 8,961                    | 5,578                |
| Receptors, opioid, mu                                        | 8,158                  | 4,616                    | 3,204                |

Table S2. Cont.

| Target                                                                                     | Publications in PubMed | Publications in RePORTER | No. of funding years |
|--------------------------------------------------------------------------------------------|------------------------|--------------------------|----------------------|
| Receptors, platelet-derived growth factor                                                  | 5,954                  | 2,356                    | 2,099                |
| Receptors, vascular endothelial growth factor                                              | 12,434                 | 5,004                    | 4,250                |
| Rocuronium or vecuronium                                                                   | 5,748                  | 53                       | 49                   |
| Serotonin receptor                                                                         | 49,278                 | 9,366                    | 7,486                |
| Serotonin receptor 2a                                                                      | 3,251                  | 1,023                    | 845                  |
| Serotonin reuptake transporter or bace1                                                    | 4,800                  | 2,105                    | 1,773                |
| Slamf7                                                                                     | 103                    | 45                       | 43                   |
| Smoothened                                                                                 | 1,663                  | 1,265                    | 1,105                |
| Sodium glucose transporter                                                                 | 3,093                  | 693                      | 611                  |
| Soluble guanylate cyclase                                                                  | 2,787                  | 778                      | 678                  |
| Somatostatin                                                                               | 31,307                 | 4,008                    | 3,173                |
| Src kinase                                                                                 | 23,471                 | 12,043                   | 9,950                |
| Sterol 14-demethylase                                                                      | 564                    | 128                      | 106                  |
| Substance P receptor or tachykinin receptor 1                                              | 4,117                  | 1,106                    | 897                  |
| Surfactant protein B                                                                       | 994                    | 465                      | 400                  |
| Survival motor neuron protein or smn or smn1<br>smn2 or survival of motor neuron 2 protein | 5,874                  | 2,588                    | 2,209                |
| Thrombin                                                                                   | 25,101                 | 3,913                    | 2,909                |
| Thymidine phosphorylase                                                                    | 2,084                  | 160                      | 146                  |
| Tissue nonspecific alkaline phosphatase                                                    | 618                    | 232                      | 148                  |
| TNFSF11                                                                                    | 2,988                  | 1,101                    | 974                  |
| TNFSF13B                                                                                   | 908                    | 553                      | 518                  |
| Urate oxidase                                                                              | 1,467                  | 108                      | 98                   |
| Urate transporter or SLC22A12 or URAT1                                                     | 450                    | 153                      | 145                  |
| Urea and kinase inhibitor                                                                  | 2,644                  | 1,219                    | 1,102                |
| Vascular endothelial growth factor receptor-2                                              | 5,447                  | 2,492                    | 2,269                |
| Viral neuraminidase                                                                        | 6,462                  | 1,058                    | 809                  |
| Voltage-gated calcium channel                                                              | 9,057                  | 3,892                    | 3,440                |
| Voltage-gated sodium channel                                                               | 8,602                  | 3,788                    | 3,038                |

**Table S3. Leading grant activity codes for projects associated with 210 NMEs approved 2010–2016 or their molecular targets**

| Grant activity code | Total   | Drug  | Target only |
|---------------------|---------|-------|-------------|
| R01                 | 117,949 | 5,749 | 112,200     |
| T3, 2               | 12,757  | 87, 8 | 11,879      |
| P01                 | 9,241   | 824   | 8,417       |
| ZIA                 | 9,165   | 655   | 8,510       |
| R37                 | 7,206   | 385   | 6,821       |
| R21                 | 6,568   | 321   | 6,247       |
| P30                 | 5,691   | 985   | 4,706       |
| Z01                 | 5,068   | 226   | 4,842       |
| U01                 | 4,844   | 434   | 4,410       |
| R56                 | 3,764   | 156   | 3,608       |
| P50                 | 3,266   | 441   | 2,825       |
| K08                 | 2,556   | 199   | 2,357       |
| U10                 | 2,172   | 293   | 1,879       |
| F32                 | 1,878   |       | 1,794       |
| U54                 | 1,821   | 176   | 1,645       |
| P20                 | 1,754   | 141   | 1,613       |
| R03                 | 1,592   |       | 1,521       |
| K01                 | 1,567   |       | 1,486       |
| F31                 | 1,484   |       | 1,446       |
| K23                 | 1,446   | 184   | 1,262       |
| K12                 |         | 116   |             |
| K24                 |         | 119   |             |
| M01                 |         | 110   |             |
| UL1                 |         | 366   |             |

F31 and F32, fellowship programs; K01, K08, K12, K23, and K24, research career programs; M01, general clinical research centers program; P01, P20, P30, and P50, research program projects and centers; R01, R03, R21, R37, and R56, research projects; T32, training program; U01, U10, U54, and UL1, cooperative agreements; Z01 and ZIA, intramural research programs.

## Other Supporting Information Files

[Dataset S1 \(XLSX\)](#)

[Dataset S2 \(XLSX\)](#)
